# Supplementary material for: Sputtered binder-free Cu3N electrode materials for high-performance quasi-solid-state asymmetric supercapacitors
Source: Royal Society of Chemistry journal article supplement (doi:10.1039/d3dt00343d), 2023-01-01
Supplement: d3dt00343d1.pdf [file d3dt00343d1.pdf]

*Supplementary information*

**Sputtered binder-free Cu<sub>3</sub>N electrode materials for high-performance quasi-solid-state asymmetric supercapacitor**

Zhengbing Qi,<sup>a,c</sup> Binbin Wei,<sup>\*a,c</sup> Hao Shen,<sup>b</sup> Zhuo Hou,<sup>a</sup> Minjie Fang,<sup>a</sup> JinGang Wu,<sup>a</sup>

Hanfeng Liang,<sup>\*b</sup> and Zhoucheng Wang<sup>\*b</sup>

<sup>a</sup> *Key Laboratory of Functional Materials and Applications of Fujian Province, School of Materials*

*Science and Engineering, Xiamen University of Technology, Xiamen 361024, China*

<sup>b</sup> *College of Chemistry and Chemical Engineering, Xiamen University, Xiamen 361005, China*

<sup>c</sup> *These authors contributed equally*

\*Corresponding author: [bbwei@xmut.edu.cn](mailto:bbwei@xmut.edu.cn) (B.B. Wei), [hfliang@xmu.edu.cn](mailto:hfliang@xmu.edu.cn) (H.F.

Liang) and [zcwang@xmu.edu.cn](mailto:zcwang@xmu.edu.cn) (Z.C. Wang)

### Specific capacity:

The areal capacity of all thin film electrodes and asymmetric supercapacitor (ASCs) can be calculated from GCD curves according to the following equation:<sup>1</sup>

$$C_a = \frac{2I \int U dt}{S U \Big|_{U_1}^{U_2}} = \frac{2I \int U dt}{S(U_2 - U_1)}$$

where  $C_a$  (mC cm<sup>-2</sup>) represents the areal capacity,  $I$  (mA) is the discharge current,  $\int U dt$  is the integral area,  $S$  (cm<sup>2</sup>) is the geometrical area of single electrode or ASC device, and  $U$  (V) is the potential with initial and final values of  $U_1$  and  $U_2$ .

### Charge balance:

The optimal areal ratio between positive and negative electrode was altered according to the charge balance denoted in equation:

$$\frac{S_{(Cu_3N)}}{S_{(AC)}} = \frac{C_{(AC)} \times \Delta U_{(AC)}}{C_{(Cu_3N)} \times \Delta U_{(Cu_3N)}}$$

Where  $S$ ,  $C$  and  $\Delta U$  are the area, specific capacitance and voltage range for positive and negative electrodes.

### Energy and power densities:

The energy and power densities of ASCs device are calculated through the following formulas:

$$E = \frac{I \int U dt}{3.6 \times S}$$
$$P = \frac{3.6 \times E}{t}$$

where  $E$  (μWh cm<sup>-2</sup>) is the energy density,  $P$  (mW cm<sup>-2</sup>) is the power density, and  $t$  is the discharge time.

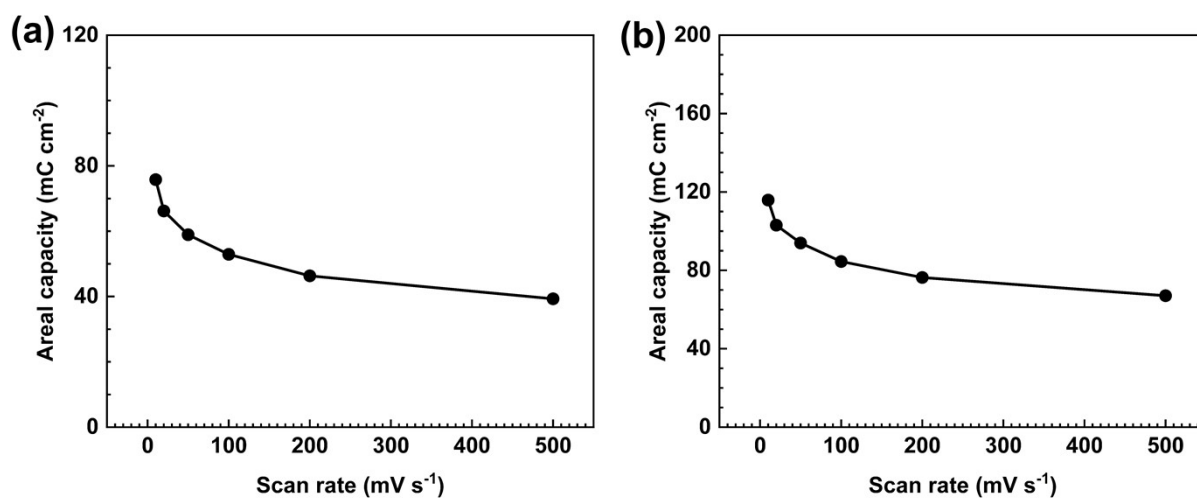

**Fig. S1** Areal capacity of (a) Cu<sub>3</sub>N thin film electrodes and (b) Cu<sub>3</sub>N//AC quasi-solid-state ASCs with respect to scan rate.

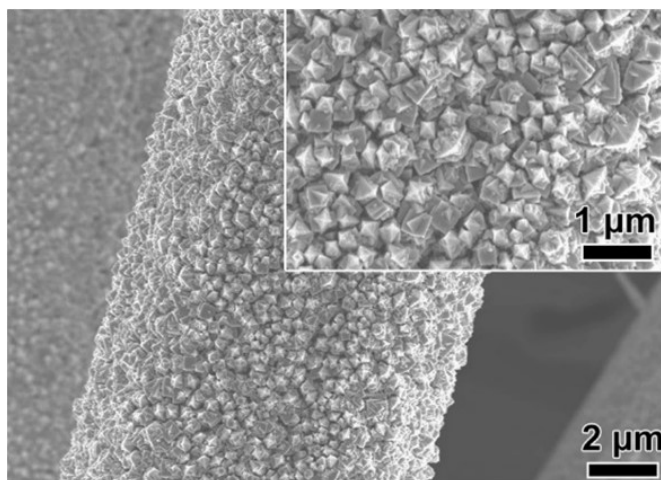

**Fig. S2** SEM images of Cu<sub>3</sub>N thin film electrodes after 20000 cycles.

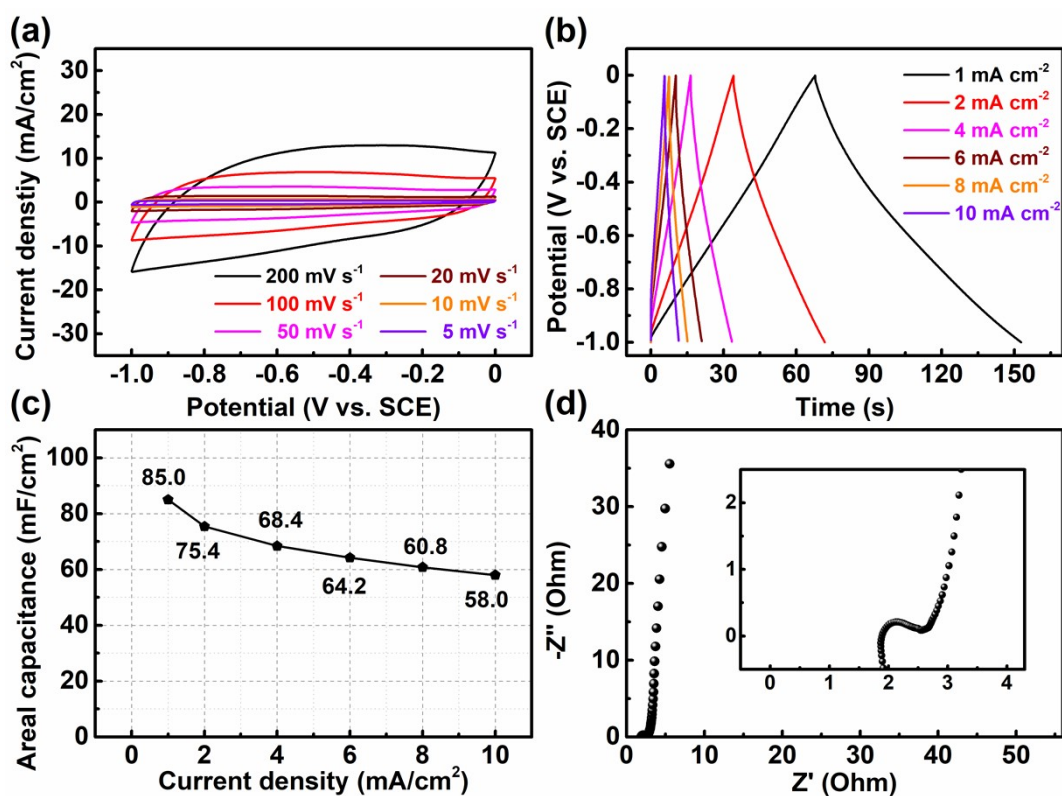

**Fig. S3** Electrochemical properties of AC negative electrodes: (a) CV profiles at different scan rates, (b) GCD curves at different current densities, (c) Areal capacitance as the function of current density, and (d) Nyquist plot (inset: the enlarged part in high-frequency region).

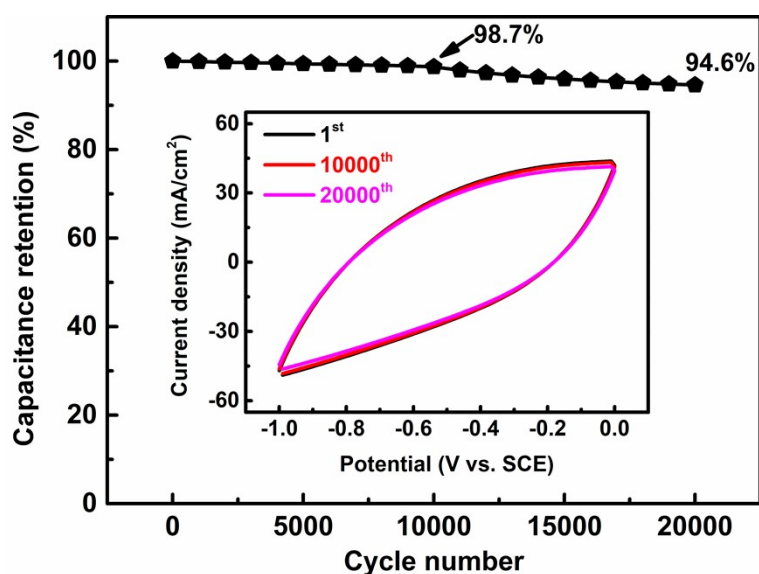

**Fig. S4** Cycling performance of AC negative electrodes (inset shows the 1<sup>st</sup>, 10000<sup>th</sup> and 20000<sup>th</sup> CV curves).

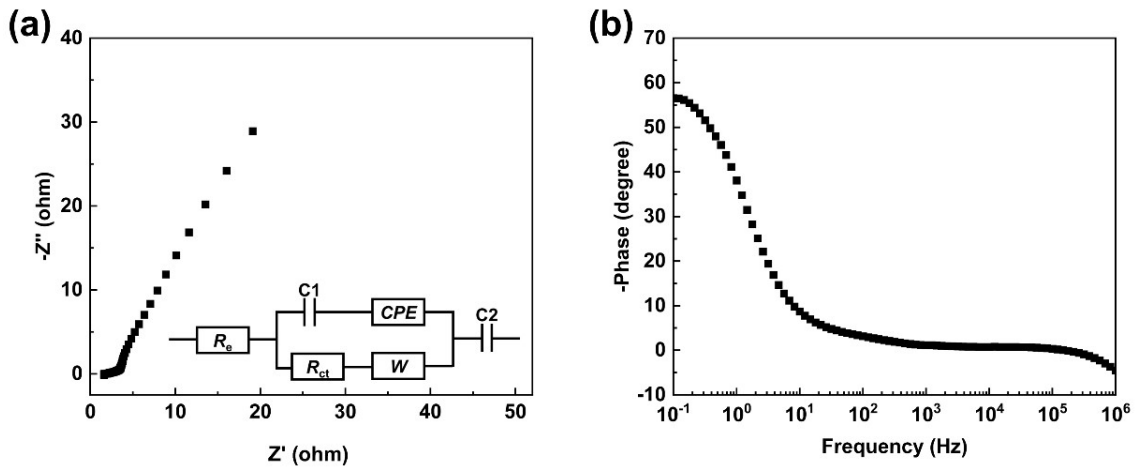

**Fig. S5** (a) Nyquist (inset: the corresponding electrical equivalent circuit) and (b) Bode plots of  $\text{Cu}_3\text{N//AC}$  quasi-solid-state ASCs.

**Table S1** Sample identification and deposition parameters of all thin films by magnetron sputtering

| Parameter settings                           | CN-280 | CN-320 | CN-360 | CN-400 |
|----------------------------------------------|--------|--------|--------|--------|
| Deposition pressure (Pa)                     | 2.0    | 2.0    | 2.0    | 2.0    |
| $\text{N}_2/(\text{N}_2+\text{Ar})$          | 40%    | 40%    | 40%    | 40%    |
| Substrate temperature ( $^{\circ}\text{C}$ ) | 280    | 320    | 360    | 400    |
| Deposition time (min)                        | 30     | 30     | 30     | 30     |
| Power (W)                                    | 250    | 250    | 250    | 250    |

**Table S2** Overview of TMNs electrodes for supercapacitor applications

| Electrode materials            | Electrolyte                     | Specific capacity<br>(capacitance)                                                                       | Potential Window | References |
|--------------------------------|---------------------------------|----------------------------------------------------------------------------------------------------------|------------------|------------|
|                                |                                 | 90.7 mC cm <sup>-2</sup> at 1 mA cm <sup>-2</sup>                                                        |                  |            |
| Cu <sub>3</sub> N film         | KOH                             | 151.1 mF cm <sup>-2</sup> at 1 mA cm <sup>-2</sup><br>88.2 mF cm <sup>-2</sup> at 100 mV s <sup>-1</sup> | 0.6 V            | This work  |
| TiNbN film                     | H <sub>2</sub> SO <sub>4</sub>  | 59.3 mF cm <sup>-2</sup> at 1.0 mA cm <sup>-2</sup>                                                      | 0.8 V            | [1]        |
| VN film                        | H <sub>2</sub> SO <sub>4</sub>  | 103.2 mF cm <sup>-2</sup> at 100 mV s <sup>-1</sup>                                                      | 0.35 V           | [2]        |
| TiN nanoparticles              | H <sub>2</sub> SO <sub>4</sub>  | 68.9 mF cm <sup>-2</sup> at 1.0 mA cm <sup>-2</sup>                                                      | 0.8 V            | [3]        |
| CrN film                       | H <sub>2</sub> SO <sub>4</sub>  | 31.9 mF cm <sup>-2</sup> at 100 mV s <sup>-1</sup>                                                       | 0.8 V            | [4]        |
| CrN film                       | H <sub>2</sub> SO <sub>4</sub>  | 31.3 mF cm <sup>-2</sup> at 1.0 mA cm <sup>-2</sup>                                                      | 0.8 V            | [5]        |
| γ-Mo <sub>2</sub> N film       | Li <sub>2</sub> SO <sub>4</sub> | 52.4 mF cm <sup>-2</sup> at 10 mV s <sup>-1</sup>                                                        | 0.8 V            | [6]        |
| CrN@NCs@CP                     | H <sub>2</sub> SO <sub>4</sub>  | 132.1 mF cm <sup>-2</sup> at 1.0 mA cm <sup>-2</sup>                                                     | 0.8 V            | [7]        |
| CrN film                       | H <sub>2</sub> SO <sub>4</sub>  | 40.6 mF cm <sup>-2</sup> at 1.0 mA cm <sup>-2</sup>                                                      | 0.8 V            | [8]        |
| VN film                        | KOH                             | 40.8 mF cm <sup>-2</sup> at 100 mV s <sup>-1</sup>                                                       | 1.4 V            | [9]        |
| Mn <sub>3</sub> N <sub>2</sub> | KOH                             | 115 mF cm <sup>-2</sup> at 1.0 mA cm <sup>-2</sup>                                                       | 0.9 V            | [10]       |
| W <sub>2</sub> N               | KOH                             | 75.0 mF cm <sup>-2</sup> at 100 mV s <sup>-1</sup>                                                       | 1.4 V            | [11]       |
| TiN                            | KCl                             | 43.5 mF cm <sup>-2</sup> at 100 mV s <sup>-1</sup>                                                       | 1.0 V            | [12]       |
| CrVN                           | KCl                             | 37.7 mF cm <sup>-2</sup> at 100 mV s <sup>-1</sup>                                                       | 1.0 V            | [13]       |

**Table S3** Performance comparison with reported TMNs supercapacitor

| Electrode materials                                                        | Electrolyte                        | Energy density<br>( $\mu\text{Wh cm}^{-2}$ ) | Power density<br>( $\text{mW cm}^{-2}$ ) | References |
|----------------------------------------------------------------------------|------------------------------------|----------------------------------------------|------------------------------------------|------------|
| $\text{Cu}_3\text{N//AC}$                                                  | KOH                                | 13.2                                         | 4.8                                      | This work  |
| VN//VN                                                                     | KOH                                | 4.6                                          | 1.5                                      | [2]        |
| H-TiN NPs//H-TiN NPs                                                       | $\text{H}_2\text{SO}_4/\text{PVA}$ | 2.65                                         | 0.4                                      | [3]        |
| $\text{CrN@NCs@CP//CrN@NCs@CP}$                                            | $\text{H}_2\text{SO}_4$            | 5.28                                         | 1.98                                     | [7]        |
| $\text{CrN//CrN}$                                                          | $\text{H}_2\text{SO}_4$            | 2                                            | 8.7                                      | [8]        |
| VN//VN                                                                     | KOH                                | 0.3                                          | 2.4                                      | [9]        |
| VN//VN                                                                     | KOH                                | 3.4                                          | 3.3                                      | [14]       |
| VN//VN                                                                     | KOH                                | 10.0                                         | 4.0                                      | [14]       |
| VN/CC//VN/CC                                                               | PVA/KOH                            | 0.11                                         | 15                                       | [15]       |
| VN/ $\text{V}_2\text{O}_3/\text{C}$ // VN/ $\text{V}_2\text{O}_3/\text{C}$ | KOH                                | 4                                            | 0.48                                     | [16]       |

## References

---

- [1] B. B. Wei, F. W. Ming, H. F. Liang, Z. B. Qi, W. S. Hu and Z. C. Wang, *J. Power Sources* 2021, **481**, 228842.
- [2] B. Asbani, K. Robert, P. Roussel, T. Brousse and C. Lethien, *Energy Storage Mater.* 2021, **37**, 207-214.
- [3] P. Qin, X. X. Li, B. Gao, J. J. Fu, L. Xia, X. M. Zhang, K. F. Huo, W. L. Shen and P. K. Chu, *Nanoscale* 2018, **10**, 8728-8734.
- [4] J. Shi, B. L. Jiang, Z. Liu, C. Li, F. Y. Yan, X. S. Liu, H. T. Li, C. Yang and D. Dong, *Ceram. Int.* 2021, **47**, 18540-18549.
- [5] B. B. Wei, G. Mei, H. F. Liang, Z. B. Qi, D. F. Zhang, H. Shen and Z. C. Wang, *J. Power Sources* 2018, **385**, 39-44.
- [6] L. M. Chen, C. Liu and Z. J. Zhang, *Electrochim. Acta* 2017, **245**, 237-248.
- [7] X. Xu, S. Y. Chang, Z. Z. Hong, Y. Zeng, H. Zhang, P. Li, S. Z. Zheng, Z. C. Wang and S. W. Duo, *Nanotechnology* 2021, **33**, 055402.
- [8] E. Haye, A. Achour, A. Guerra, F. Moulai, T. Hadjersi, R. Boukherroub, A. Panepinto, T. Brousse, J. -J. Pireaux and S. Lucas, *Electrochim. Acta* 2019, **324**, 134890.
- [9] K. Robert, C. Douard, A. Demortière, F. Blanchard, P. Roussel, T. Brousse and C. Lethien, *Adv. Mater. Technol.* 2018, **3**, 1800036.
- [10] G. Durai, P. Kuppasami, T. Maiyalagan, M. Ahila and P. V. Kumar, *Ceram. Int.* 2019, **45**, 17120-17127.
- [11] S. Ouendi, K. Robert, D. Stiévenard, T. Brousse, P. Roussel and C. Lethien, *Energy Storage Mater.* 2019, **20**, 243-252.
- [12] N. N. Sun, D. Y. Zhou, W. W. Liu, S. Y. Shi, Z. J. Tian, F. Liu, S. D. Li, J. J. Wang and F. Z. Ali, *ACS Sustainable Chem. Eng.* 2020, **8**, 7869-7878.
- [13] D. Durai, K. Kuppasami, T. Maiyalagan, J. Theerthagiri, V. K. Ponnusamy and H. -S. Kim, *Ceram.*



---

*Int.* 2019, **45**, 12643-12653.

[14] K. Robert, D. Stiévenard, D. Deresmes, C. Douard, A. Iadecola, D. Troadec, P. Simon, N. Nuns, M. Marinova, M. Huvé, P. Roussel, T. Brousse and C. Lethien, *Energy Environ. Sci.* 2020, **13**, 949-957.

[15] Z. Q. Wu, H. Li, H. Li, B. B. Yang, R. H. Wei, X. G. Zhu, X. B. Zhu and Y. P. Sun, *Chem. Eng. J.* 2022, **444**, 136597.

[16] Y.F. Zhang, X.F. Wang, J.Q. Zheng, T. Hu, X. Liu and C.G. Meng, *Appl. Surf. Sci.* 2019, **471**, 842-851.
